# Supplementary material for: The role of tumor-associated macrophages (TAMs) in tumor progression and relevant advance in targeted therapy
Source: PubMed Central journal article supplement — Acta Pharm Sin B. 2020 Apr 19;10(11):2156–70. doi: 10.1016/j.apsb.2020.04.004 (PMC7714989; doi:10.1016/j.apsb.2020.04.004), 2020-04-19
Supplement: mmc1.pdf [file mmc1.pdf]

## Supporting Information for

### REVIEW

#### The role of tumor-associated macrophages (TAMs) in tumor progression and relevant advance in targeted therapy

Qiyao Yang<sup>a,b</sup>, Ningning Guo<sup>a</sup>, Yi Zhou<sup>a</sup>, Jiejian Chen<sup>b</sup>, Qichun Wei<sup>b,\*</sup>, Min Han<sup>a,\*</sup>

<sup>a</sup>*Institute of Pharmaceutics, College of Pharmaceutical Sciences, Zhejiang University, Hangzhou 310058, China*

<sup>b</sup>*Department of Radiation Oncology, Key Laboratory of Cancer Prevention and Intervention, the Second Affiliated Hospital, College of Medicine, Zhejiang University, Hangzhou 310058, China*

\*Corresponding authors. Tel.: +86 571 88208437.

E-mail address: qichun\_wei@zju.edu.cn (Qichun Wei), hanmin@zju.edu.cn (Min Han).

**Table S1** Clinical trials of TAM-targeting agents.

| Strategy                                             | Target          | Drug       | Company (Sponsor)                                                   | ClinicalTrial.gov reference | Clinical phase | Tumor type                              |
|------------------------------------------------------|-----------------|------------|---------------------------------------------------------------------|-----------------------------|----------------|-----------------------------------------|
| Inhibition of recruitment of mononuclear macrophages | CCR2 antagonist | CCX-827    | University of Rochester                                             | NCT03778879                 | I/II           | Adenocarcinoma;<br>pancreatic neoplasms |
|                                                      |                 |            | ChemoCentryx                                                        | TrialTroveID-291617         | II             | Pancreatic neoplasms                    |
|                                                      |                 |            | ChemoCentryx                                                        | NCT02345408                 | I              | Adenocarcinoma;<br>pancreatic neoplasms |
|                                                      |                 | PF-4136309 | National Institutes of Health/National Cancer Institute; Washington | NCT01413022                 | I              | Adenocarcinoma;<br>pancreatic neoplasms |

University School of Medicine

|                          |                         |                                                                                                      |                     |      |                                                                                                                                                                                                     |
|--------------------------|-------------------------|------------------------------------------------------------------------------------------------------|---------------------|------|-----------------------------------------------------------------------------------------------------------------------------------------------------------------------------------------------------|
|                          |                         | Pfizer                                                                                               | NCT02732938         | I/II | Adenocarcinoma;<br>pancreatic neoplasms                                                                                                                                                             |
|                          | Carlumab                | Johnson & Johnson/Janssen<br>Biotech                                                                 | NCT01204996         | I    | Breast neoplasms;<br>non-small-cell lung<br>cancer; colorectal<br>neoplasms; liver cancer;<br>melanoma; pancreatic<br>neoplasms; prostatic<br>neoplasms; stomach<br>neoplasms; thyroid<br>neoplasms |
|                          |                         | Johnson & Johnson/Janssen<br>Biotech                                                                 | NCT00992186         | II   | Prostatic neoplasms                                                                                                                                                                                 |
|                          |                         | Johnson & Johnson/Janssen<br>Biotech                                                                 | NCT00537368         | I    | Melanoma; ovarian<br>cancer                                                                                                                                                                         |
| CCR2, CCR5<br>antagonist | BMS-813160<br>(capsule) | Bristol-Myers Squibb; Sidney<br>Kimmel Comprehensive<br>Cancer Center at Johns<br>Hopkins            | NCT03767582         | I/II | Adenocarcinoma;<br>pancreatic neoplasms                                                                                                                                                             |
|                          | BMS-813160              | School of Medicine; National<br>Institutes of Health; (other<br>hospital/academic/medical<br>center) | NCT03496662         | I/II | Adenocarcinoma;<br>pancreatic neoplasms                                                                                                                                                             |
|                          |                         | Bristol-Myers Squibb                                                                                 | NCT03184870         | I/II | Colorectal neoplasms;<br>pancreatic neoplasms                                                                                                                                                       |
| CCR5 antagonist          | OB-0020                 | Orion Biotechnology                                                                                  | TrialTroveID-351127 | I    | Neoplasms, unknown<br>primary; stomach                                                                                                                                                              |

|                  |                                   |                                                                                                                |                                    |            |                                                                                                   |
|------------------|-----------------------------------|----------------------------------------------------------------------------------------------------------------|------------------------------------|------------|---------------------------------------------------------------------------------------------------|
|                  |                                   |                                                                                                                |                                    |            | neoplasms                                                                                         |
|                  | Leronlimab (SC)                   | CytoDyn<br>CytoDyn                                                                                             | TrialTroveID-343325<br>NCT03838367 | II<br>I/II | Colorectal neoplasms<br>Breast neoplasms; triple negative breast neoplasms                        |
|                  | Vicriviroc maleate; pembrolizumab | Merck & Co./Merck Sharp & Dohme (MSD)                                                                          | NCT03631407                        | II         | Colorectal neoplasms                                                                              |
|                  | Maraviroc; pembrolizumab          | (Other hospital/academic/medical center)<br>University of Heidelberg; (other hospital/academic/medical center) | TrialTroveID-314475<br>NCT03274804 | I<br>I     | Stomach carcinoma<br>Colorectal neoplasms                                                         |
|                  | Maraviroc (tablet)                | (Other hospital/academic/medical center)                                                                       | NCT01736813                        | I          | Colorectal neoplasms; liver neoplasms; neoplasm metastasis                                        |
| CSF1R antagonist | MCS110                            | (Other hospital/academic/medical center)<br>Novartis                                                           | NCT03785496<br>NCT02435680         | II<br>II   | Carcinoma, squamous cell; esophageal cancer<br>Breast neoplasms; triple negative breast neoplasms |
|                  | Pacritinib                        | University of Michigan<br>Comprehensive Cancer Center                                                          | NCT03601819                        | I          | Leukemia, chronic lymphocytic; lymphoma, non-Hodgkin's                                            |
|                  | Vorolanib                         | Bristol-Myers Squibb; Vanderbilt-Ingram Cancer Center; Xcovery                                                 | NCT03583086                        | I/II       | Non-small-cell lung cancer; thoracic neoplasms; thymoma                                           |
|                  | Cabiralizumab                     | Bristol-Myers Squibb                                                                                           | NCT03336216                        | II         | Pancreatic cancer                                                                                 |

|            |                                                                                                              |             |    |                                                                                                                                                                                                                        |
|------------|--------------------------------------------------------------------------------------------------------------|-------------|----|------------------------------------------------------------------------------------------------------------------------------------------------------------------------------------------------------------------------|
|            | Bristol-Myers Squibb; Five Prime Therapeutics                                                                | NCT02526017 | I  | Non-small-cell lung cancer; colorectal neoplasms; glioblastoma; head and neck neoplasms; melanoma; ovarian cancer; pancreatic neoplasms; renal cancer                                                                  |
| UCB-6352   | Syndax                                                                                                       | NCT03238027 | I  | Neoplasm metastasis; neoplasms, unknown primary                                                                                                                                                                        |
| IMC-CS4    | Eli Lilly; Sidney Kimmel Comprehensive Cancer Center at Johns Hopkins; Merck & Co./Merck Sharp & Dohme (MSD) | NCT03153410 | I  | Adenocarcinoma; pancreatic cancer                                                                                                                                                                                      |
| DCC-3014   | Deciphera Pharmaceuticals                                                                                    | NCT03069469 | I  | Acute myelocytic leukemia; breast neoplasms; non-small-cell lung cancer; chronic lymphocytic leukemia; giant cell tumors; ovarian neoplasms; prostatic neoplasms; stomach carcinoma; synovitis, pigmented villonodular |
| PD-0360324 | MD Anderson Cancer Center, University of Texas; National Institutes of Health/National Cancer Institute      | NCT02948101 | II | Carcinoma, ovarian epithelial; fallopian tube neoplasms; ovarian neoplasms                                                                                                                                             |

|                       |                                                                                                         |                     |      |                                                                                                                                                |
|-----------------------|---------------------------------------------------------------------------------------------------------|---------------------|------|------------------------------------------------------------------------------------------------------------------------------------------------|
| Emactuzumab           | MD Anderson Cancer Center, University of Texas; National Institutes of Health/National Cancer Institute | NCT02923739         | II   | Adenocarcinoma; Brenner tumor; carcinoma, endometrioid; transitional cell cancer; cystadenocarcinoma; fallopian tube neoplasms; ovarian cancer |
|                       | F. Hoffmann-La Roche                                                                                    | NCT02760797         | I    | Breast neoplasms; colorectal neoplasms; melanoma; mesothelioma; ovarian neoplasms; pancreatic neoplasms; stomach carcinoma                     |
|                       | F. Hoffmann-La Roche                                                                                    | NCT02323191         | I    | Breast neoplasms; ovarian cancer; soft tissue neoplasms; stomach neoplasms; urinary bladder neoplasms                                          |
|                       | F. Hoffmann-La Roche                                                                                    | TrialTroveID-170297 | I/II | Neoplasms, unknown primary                                                                                                                     |
|                       | F. Hoffmann-La Roche                                                                                    | NCT01494688         | I/II | Breast neoplasms; endometrial neoplasms; mesothelioma; neoplasms, unknown primary; ovarian cancer; pancreatic cancer                           |
| Pexidartinib (tablet) | Daiichi Sankyo                                                                                          | NCT02734433         | I    | Neoplasms, unknown primary                                                                                                                     |
| Pexidartinib          | Herbert Irving Comprehensive Cancer Center at Columbia University; Daiichi Sankyo/Plexxikon             | NCT02584647         | I/II | Nerve sheath neoplasms; neurofibrosarcoma; sarcoma; soft tissue neoplasms                                                                      |

|                                                                                                         |             |      |                                                                                                                                                                                                                                                                                                                                  |
|---------------------------------------------------------------------------------------------------------|-------------|------|----------------------------------------------------------------------------------------------------------------------------------------------------------------------------------------------------------------------------------------------------------------------------------------------------------------------------------|
| Barbara Ann Karmanos<br>Cancer Institute; National<br>Institutes of Health/National<br>Cancer Institute | NCT02472275 | I    | Adenocarcinoma;<br>prostatic neoplasms                                                                                                                                                                                                                                                                                           |
| Merck & Co./Merck Sharp &<br>Dohme (MSD); Daiichi<br>Sankyo/Plexxikon                                   | NCT02452424 | I/II | Breast neoplasms;<br>non-small-cell lung<br>cancer; carcinoma,<br>squamous cell; colorectal<br>neoplasms;<br>gastrointestinal stromal<br>tumors; head and neck<br>neoplasms; liver cancer;<br>melanoma; ovarian<br>cancer; pancreatic<br>neoplasms; soft tissue<br>neoplasms; stomach<br>carcinoma; urinary<br>bladder neoplasms |
| Daiichi Sankyo/Plexxikon                                                                                | NCT01790503 | I/II | Glioblastoma; soft tissue<br>neoplasms                                                                                                                                                                                                                                                                                           |
| Daiichi Sankyo/Plexxikon                                                                                | NCT01525602 | I    | Breast neoplasms;<br>non-small-cell lung<br>cancer; colorectal<br>neoplasms; head and neck<br>neoplasms; ovarian<br>neoplasms; pancreatic<br>cancer; small cell lung<br>carcinoma; soft tissue<br>neoplasms; stomach<br>neoplasms; urinary<br>bladder neoplasms                                                                  |
| Daiichi Sankyo/Plexxikon                                                                                | NCT01349036 | II   | Glioblastoma                                                                                                                                                                                                                                                                                                                     |

|                    |                                                                            |             |        |                                                                                                                                                                                                                                                                                                     |
|--------------------|----------------------------------------------------------------------------|-------------|--------|-----------------------------------------------------------------------------------------------------------------------------------------------------------------------------------------------------------------------------------------------------------------------------------------------------|
|                    | Daiichi Sankyo/Plexxikon                                                   | NCT01349049 | I/II   | Acute myelocytic leukemia                                                                                                                                                                                                                                                                           |
|                    | Daiichi Sankyo/Plexxikon                                                   | NCT01217229 | II     | Hodgkin lymphoma                                                                                                                                                                                                                                                                                    |
|                    | Susan G. Komen Breast Cancer Research Foundation; Daiichi Sankyo/Plexxikon | NCT01596751 | I/II   | Breast neoplasms                                                                                                                                                                                                                                                                                    |
|                    | Daiichi Sankyo/Plexxikon                                                   | NCT01004861 | I      | Breast neoplasms; non-small-cell lung cancer; colorectal neoplasms; endometrial neoplasms; gastrointestinal stromal tumors; Hodgkin lymphoma; osteosarcoma; ovarian neoplasms; pancreatic neoplasms; prostatic neoplasms; soft tissue sarcoma; synovitis, pigmented villonodular; thyroid neoplasms |
| AMG-820            | Amgen; Merck & Co./Merck Sharp & Dohme (MSD)                               | NCT02713529 | I/II   | Non-small-cell lung cancer; colorectal neoplasms; pancreatic neoplasms                                                                                                                                                                                                                              |
|                    | Amgen                                                                      | NCT01444404 | I      | Breast neoplasms; prostatic neoplasms; urinary bladder neoplasms                                                                                                                                                                                                                                    |
| Masitinib (tablet) | AB Science                                                                 | NCT02490488 | II/III | Neoplasms; glandular and epithelial; ovarian cancer                                                                                                                                                                                                                                                 |
|                    | AB Science                                                                 | NCT03766295 | III    | Pancreatic cancer                                                                                                                                                                                                                                                                                   |

|                         |                    |                                                                                             |                     |     |                                         |
|-------------------------|--------------------|---------------------------------------------------------------------------------------------|---------------------|-----|-----------------------------------------|
|                         |                    | AB Science                                                                                  | NCT01694277         | III | Gastrointestinal stromal tumors         |
|                         | Sunitinib          | AB Science                                                                                  | NCT01280565         | III | Melanoma                                |
|                         |                    | MD Anderson Cancer Center, University of Texas; Pfizer                                      | NCT02060370         | II  | Renal cancer                            |
|                         |                    | National Institutes of Health/National Cancer Institute; Pfizer; University of Pennsylvania | NCT00717587         | II  | Renal cancer                            |
|                         | IMA-901            | Immatics biotechnologies                                                                    | NCT01265901         | III | Renal cancer                            |
|                         | Pazopanib (tablet) | GlaxoSmithKline; Novartis                                                                   | NCT00720941         | III | Renal cancer                            |
| CXCR4 antagonist        | Plerixafor         | Sinopharm A-Think Pharmaceutical Co.                                                        | TrialTroveID-308056 | I   | Lymphoma, non-Hodgkin's                 |
|                         |                    | Sinopharm A-Think Pharmaceutical Co.                                                        | TrialTroveID-294594 | II  | Lymphoma, non-Hodgkin's                 |
|                         |                    | Sanofi/Sanofi Genzyme; Patheon                                                              | NCT01767714         | III | Lymphoma, non-Hodgkin's                 |
|                         |                    | Sanofi/Sanofi Genzyme                                                                       | NCT01164475         | IV  | Lymphoma, non-Hodgkin's                 |
|                         | Plerixafor (IV)    | Hunan Wuzhoutong Pharmaceutical Co.                                                         | TrialTroveID-306136 | III | Lymphoma, non-Hodgkin; multiple myeloma |
| PI3K $\gamma$ inhibitor | IPI-549            | (Other cooperative group)                                                                   | NCT03795610         | II  | Head and neck neoplasms                 |
|                         |                    | Bristol-Myers Squibb; Infinity Pharmaceuticals                                              | NCT03980041         | II  | Renal cancer                            |
|                         |                    | Infinity Pharmaceuticals; Arcus Biosciences                                                 | TrialTroveID-322856 | I   | Breast neoplasms; ovarian cancer        |

|                                      |                        |                |                                                                                                                                    |             |      |                                                                                                                                                                                         |
|--------------------------------------|------------------------|----------------|------------------------------------------------------------------------------------------------------------------------------------|-------------|------|-----------------------------------------------------------------------------------------------------------------------------------------------------------------------------------------|
|                                      |                        |                | Bristol-Myers Squibb; Infinity Pharmaceuticals                                                                                     | NCT02637531 | I    | Adrenocortical carcinoma; breast neoplasms; non-small-cell lung cancer; head and neck neoplasms; liver cancer; mesothelioma; neoplasms, squamous cell; triple negative breast neoplasms |
| Eliminating activated TAMs precisely | TRAIL receptor agonist | Duvelisib      | Infinity Pharmaceuticals; Verastem Oncology                                                                                        | NCT02391545 | I/II | Lymphoma, non-Hodgkin's                                                                                                                                                                 |
|                                      |                        | ONC-201        | National Institutes of Health/National Cancer Institute; (other hospital/academic/medical center)                                  | NCT02038699 | I    | Breast neoplasms; non-small-cell lung cancer; colorectal neoplasms; endometrial neoplasms; glioblastoma; prostatic neoplasms; triple negative breast neoplasms                          |
|                                      |                        | Conatumumab    | Amgen                                                                                                                              | NCT00791011 | I    | Lymphoma, non-Hodgkin's                                                                                                                                                                 |
|                                      | IL4Ra                  | Dupilumab (SC) | Sidney Kimmel Comprehensive Cancer Center at Johns Hopkins; Regeneron                                                              | NCT03886493 | II   | Prostatic neoplasms                                                                                                                                                                     |
| Repolarizing TAMs                    | TLR4 agonist           | ID-CMB305      | MD Anderson Cancer Center, University of Texas; National Institutes of Health/National Cancer Institute; Merck & Co./Immune Design | NCT03450122 | I    | Soft tissue sarcoma                                                                                                                                                                     |
|                                      |                        |                | Merck & Co./Immune Design                                                                                                          | NCT03520959 | III  | Soft tissue sarcoma                                                                                                                                                                     |
|                                      |                        | GSK-1795091    | GlaxoSmithKline; IQVIA                                                                                                             | NCT03447314 | I    | Head and neck neoplasms                                                                                                                                                                 |

|                 |                                                                                                                                                                                                              |                                                                  |                     |                         |                                                         |
|-----------------|--------------------------------------------------------------------------------------------------------------------------------------------------------------------------------------------------------------|------------------------------------------------------------------|---------------------|-------------------------|---------------------------------------------------------|
|                 | ID-G100                                                                                                                                                                                                      | Merck & Co./Merck Sharp & Dohme (MSD); Merck & Co./Immune Design | NCT02501473         | I/II                    | Lymphoma, non-Hodgkin's                                 |
| TLR7 agonist    | GLAAS                                                                                                                                                                                                        | Merck & Co./Immune Design                                        | NCT02035657         | I                       | Carcinoma, Merkle cell                                  |
|                 | DSP-0509                                                                                                                                                                                                     | Sumitomo Dainippon Pharma {Dainippon Sumitomo}/Boston Biomedical | NCT03416335         | I                       | Unspecified solid tumor                                 |
| TLR9 agonist    | ARB-1598 (intratumoral)                                                                                                                                                                                      | University of Pittsburgh; Checkmate Pharmaceuticals              | NCT03618641         | II                      | Melanoma                                                |
|                 | Ad5/3-D24-R GD cancer therapy                                                                                                                                                                                | Targovax                                                         | NCT03003676         | I/II                    | Melanoma                                                |
|                 |                                                                                                                                                                                                              | Targovax                                                         | NCT01598129         | I                       | Mesothelioma; unspecified solid tumor                   |
|                 | CGTG-102                                                                                                                                                                                                     | Targovax                                                         | TrialTroveID-126531 | I                       | Unknown primary                                         |
|                 |                                                                                                                                                                                                              | Targovax                                                         | TrialTroveID-191306 | II                      | Mesothelioma; ovarian neoplasms; soft tissue neoplasms; |
|                 | Lefitolimod                                                                                                                                                                                                  | Sanofi                                                           | TrialTroveID-155042 | I/II                    | Colorectal neoplasms                                    |
| Agatolimod (SC) | Pfizer                                                                                                                                                                                                       | NCT00824733                                                      | II                  | Breast neoplasms        |                                                         |
| 1018 ISS (SC)   | Dana-Farber/Harvard Cancer Center at Dana Farber Cancer Institute; University of Rochester; James P. Wilmot Cancer Center; Massachusetts General Hospital; Dynavax Technologies; Brigham and Womens Hospital | NCT00251394                                                      | II                  | Lymphoma, non-Hodgkin's |                                                         |

|                             |              |                                                                                                                                |                     |      |                                                                                                                                      |
|-----------------------------|--------------|--------------------------------------------------------------------------------------------------------------------------------|---------------------|------|--------------------------------------------------------------------------------------------------------------------------------------|
|                             | IMO-2055     | Lombardi Cancer Center at Georgetown University Medical Center; Idera Pharmaceuticals                                          | TrialTroveID-006714 | I    | Breast neoplasms; non-small-cell lung cancer; colorectal neoplasms; melanoma; renal cancer; soft tissue neoplasms                    |
| TLR9 agonist, BTK inhibitor | SD-101       | National Institutes of Health/National Cancer Institute; Stanford University Medical Center; Johnson & Johnson/Janssen Biotech | NCT02927964         | I/II | Lymphoma, non-Hodgkin's                                                                                                              |
|                             |              | National Institutes of Health/National Cancer Institute; American College of Radiology Imaging Network                         | NCT01042379         | II   | Breast neoplasms                                                                                                                     |
| CD40 agonist                | APX-005M     | Columbia University Medical Center; Apexigen                                                                                   | NCT03719430         | II   | Sarcoma; soft tissue neoplasms                                                                                                       |
|                             |              | Bristol-Myers Squibb; Yale University; Apexigen                                                                                | NCT03502330         | I/II | Non-small-cell lung cancer; lung neoplasms; melanoma; renal cancer                                                                   |
|                             |              | Apexigen                                                                                                                       | NCT02482168         | I    | Non-small-cell lung cancer; carcinoma, transitional cell; head and neck neoplasms; melanoma; renal cancer; urinary bladder neoplasms |
|                             | Selicrelumab | F. Hoffmann-La Roche                                                                                                           | NCT02760797         | I    | Breast neoplasms; colorectal neoplasms; melanoma; mesothelioma; ovarian cancer; pancreatic neoplasms; stomach neoplasms              |

|                 |             |                                                                              |                     |      |                                                                                                                                                                   |
|-----------------|-------------|------------------------------------------------------------------------------|---------------------|------|-------------------------------------------------------------------------------------------------------------------------------------------------------------------|
|                 | Chi Lob 7/4 | Cancer Research UK; National Health Service (NHS)-UK                         | NCT01561911         | I    | Non-small-cell lung cancer; colorectal neoplasms; esophageal cancer; head and neck neoplasms; lymphoma, non-Hodgkin; melanoma; mesothelioma; pancreatic neoplasms |
| CD47 antagonist | Hu5F9-G4    | AstraZeneca/Acerta Pharma Roche/Genentech;                                   | TrialTroveID-349686 | I    | Lymphoma, non-Hodgkin                                                                                                                                             |
|                 |             | AstraZeneca/Acerta Pharma; Forty Seven                                       | TrialTroveID-348436 | I    | Lymphoma, non-Hodgkin                                                                                                                                             |
|                 |             | Seattle Genetics; Ono Pharmaceutical; F. Hoffmann-La Roche; Astellas Pharma; | NCT03869190         | I/II | Urinary bladder neoplasms                                                                                                                                         |
|                 |             | GlaxoSmithKline/Tesaro; Forty Seven Roche/Genentech                          | TrialTroveID-317596 | I    | Urinary bladder neoplasms                                                                                                                                         |
|                 |             | Roche/Genentech; F. Hoffmann-La Roche; Forty Seven                           | NCT03922477         | I    | Leukemia, acute myelogenous                                                                                                                                       |
|                 |             | Forty Seven; (other academic cancer center)                                  | NCT03248479         | I    | Acute myelocytic leukemia; myelodysplastic syndromes                                                                                                              |
|                 |             | Forty Seven                                                                  | NCT02953782         | I/II | Breast neoplasms; colorectal neoplasms; head and neck neoplasms; ovarian neoplasms; pancreatic cancer                                                             |

|         |                                                                                                                                                                                          |                     |      |                                                                                                                                                                                                    |
|---------|------------------------------------------------------------------------------------------------------------------------------------------------------------------------------------------|---------------------|------|----------------------------------------------------------------------------------------------------------------------------------------------------------------------------------------------------|
|         | Forty Seven; (other industry sponsor)                                                                                                                                                    | NCT02953509         | I/II | Lymphoma, non-Hodgkin's                                                                                                                                                                            |
|         | (Other cooperative group); Medical Research Council; Cancer Research UK; Stanford University Medical Center; University of Oxford; (other hospital/academic/medical center); Forty Seven | NCT02678338         | I    | Leukemia, acute myelogenous; myelodysplastic syndrome                                                                                                                                              |
|         | Forty Seven                                                                                                                                                                              | NCT02216409         | I    | Breast neoplasms; non-small-cell lung cancer; colorectal neoplasms; head and neck neoplasms; Hodgkin lymphoma; lymphoma, non-Hodgkin; ovarian cancer; pancreatic neoplasms; thyroid neoplasms      |
| IBI-188 | Innovent Biologics (Suzhou) Co.                                                                                                                                                          | NCT03717103         | I    | Hodgkin lymphoma; lymphoma, non-Hodgkin                                                                                                                                                            |
| TI-061  | Tioma Therapeutics                                                                                                                                                                       | TrialTroveID-305697 | I/II | Breast neoplasms; non-small-cell lung cancer; colorectal neoplasms; esophageal cancer; liver cancer; melanoma; ovarian cancer; soft tissue neoplasms; stomach neoplasms; urinary bladder neoplasms |

|                                  |                         |                                                          |                     |    |                                                                                                                                                                          |
|----------------------------------|-------------------------|----------------------------------------------------------|---------------------|----|--------------------------------------------------------------------------------------------------------------------------------------------------------------------------|
|                                  | SRF-231                 | Surface Oncology                                         | NCT03512340         | I  | Acute myelocytic leukemia; hematologic neoplasms; lymphoma, non-Hodgkin; multiple myeloma; myelodysplastic syndromes; ovarian neoplasms                                  |
|                                  | SIRPa-Fc (intratumoral) | Trillium Therapeutics                                    | NCT02890368         | I  | Breast neoplasms; carcinoma, Merkle cell; carcinoma, squamous cell; lymphoma, non-Hodgkin; melanoma; mycoses; soft tissue sarcoma                                        |
|                                  | SIRPa-Fc (intravenous)  | Trillium Therapeutics                                    | NCT02663518         | I  | Acute myelocytic leukemia; chronic lymphocytic leukemia; Hodgkin lymphoma; lymphoma, non-Hodgkin; multiple myeloma; myelodysplastic syndromes; small cell lung carcinoma |
|                                  | CC-90002                | Celgene                                                  | NCT02641002         | I  | Acute myelocytic leukemia; leukemia; myelodysplastic syndromes                                                                                                           |
| Bruton tyrosine kinase inhibitor | Acalabrutinib           | AstraZeneca/Acerta Pharma                                | TrialTroveID-349686 | I  | Lymphoma, non-Hodgkin                                                                                                                                                    |
|                                  |                         | National Institutes of Health; AstraZeneca/Acerta Pharma | NCT02337829         | II | Chronic lymphocytic leukemia; lymphoma, non-Hodgkin                                                                                                                      |

|                       |                     |                                                                                            |                     |      |                                                        |
|-----------------------|---------------------|--------------------------------------------------------------------------------------------|---------------------|------|--------------------------------------------------------|
|                       | Ibrutinib           | National Institutes of Health/National Cancer Institute; Mayo Clinic                       | NCT03015792         | I/II | Multiple myeloma                                       |
|                       | Ibrutinib (capsule) | AbbVie/Pharmacyclics; Icahn School of Medicine at Mount Sinai                              | NCT02943473         | II   | Multiple myeloma                                       |
|                       |                     | Johnson & Johnson/Janssen Pharmaceuticals; F. Hoffmann-La Roche                            | NCT02558816         | I/II | Lymphoma, non-Hodgkin's                                |
|                       |                     | Bristol-Myers Squibb; Johnson & Johnson/Janssen R&D                                        | NCT02329847         | I/II | Leukemia, chronic lymphocytic; lymphoma, non-Hodgkin's |
|                       |                     | AbbVie/Pharmacyclics; Johnson & Johnson/Janssen-Cilag                                      | NCT01779791         | II   | Lymphoma, non-Hodgkin's                                |
|                       |                     | National Institutes of Health/National Cancer Institute;                                   | TrialTroveID-147956 | II   | Lymphoma, non-Hodgkin's                                |
|                       |                     | AbbVie/Pharmacyclics                                                                       |                     |      |                                                        |
|                       |                     | AbbVie/Pharmacyclics; Johnson & Johnson/Janssen Pharmaceuticals                            | NCT01569750         | I/II | Lymphoma, non-Hodgkin's                                |
| mTOR kinase inhibitor | BGT-226             | Novartis                                                                                   | NCT00742105         | I    | Unspecified solid tumor                                |
|                       | Everolimus          | Novartis; Federation Nationale des Centres de Lutte contre le Cancer; F. Hoffmann-La Roche | NCT00674414         | II   | Breast neoplasms                                       |
|                       |                     | National Institutes of Health/National Cancer Institute; Mayo Clinic                       | NCT02254239         | I    | Lymphoma, Hodgkin's                                    |
|                       |                     | Novartis; Asan Medical Center                                                              | NCT01830153         | II   | Osteosarcoma; soft tissue sarcoma                      |

|                         |                                                                                                                                                                                   |             |      |                                                                                                                                                                                                                                                                                |
|-------------------------|-----------------------------------------------------------------------------------------------------------------------------------------------------------------------------------|-------------|------|--------------------------------------------------------------------------------------------------------------------------------------------------------------------------------------------------------------------------------------------------------------------------------|
|                         | Novartis; Winship Cancer<br>Institute of Emory University                                                                                                                         | NCT01470209 | I    | Breast neoplasms;<br>non-small-cell lung<br>cancer; colorectal<br>neoplasms; glioblastoma;<br>head and neck neoplasms;<br>lung neoplasms;<br>medulloblastoma;<br>osteosarcoma; ovarian<br>cancer; soft tissue<br>neoplasms; thyroid<br>neoplasms; urinary<br>bladder neoplasms |
| Sapanisertib            | Takeda/Takeda Oncology                                                                                                                                                            | NCT03370302 | I    | Unspecified solid tumor                                                                                                                                                                                                                                                        |
| Vistusertib             | National Institutes of<br>Health/National Cancer<br>Institute; Sidney Kimmel<br>Comprehensive Cancer Center<br>at Johns Hopkins<br>(Other<br>hospital/academic/medical<br>center) | NCT03366103 | I/II | Lung, small cell;<br>neuroendocrine;<br>unspecified solid tumor                                                                                                                                                                                                                |
|                         |                                                                                                                                                                                   | NCT02730923 | I/II | Endometrial; metastatic<br>cancer                                                                                                                                                                                                                                              |
|                         | AstraZeneca                                                                                                                                                                       | NCT02640755 | I    | Unspecified solid tumor                                                                                                                                                                                                                                                        |
| Vistusertib<br>(tablet) | AstraZeneca                                                                                                                                                                       | NCT02599714 | I/II | Breast neoplasms                                                                                                                                                                                                                                                               |
| Sirolimus               | Herbert Irving Comprehensive<br>Cancer Center at Columbia<br>University; Daiichi<br>Sankyo/Plexxikon                                                                              | NCT02584647 | I/II | Soft tissue sarcoma                                                                                                                                                                                                                                                            |

---
